# Supplementary material for: Mitophagy links oxidative stress conditions and neurodegenerative diseases
Source: PubMed Central journal article supplement — Neural Regen Res. 2019 May;14(5):749–56. doi: 10.4103/1673-5374.249218 (PMC6375051; doi:10.4103/1673-5374.249218), 2019-05
Supplement: NRR-14-749_Suppl1.pdf [file NRR-14-749_Suppl1.pdf]

## OPEN PEER REVIEW REPORT 1

**Name of journal:** Neural Regeneration Research

**Manuscript NO:** NRR-D-18-00418

**Title:** Link of mitophagy between oxidative stress conditions and central nervous system diseases

**Reviewer's Name:** Ivan Fernandez-Vega

**Reviewer's country:** Spain

**Date sent for review:** 2018-06-23

**Date reviewed:** 2018-06-29

**Review time:** 6 days

### COMMENTS TO AUTHORS

This review extracts many ideas concerning mitophagy and CNS diseases from different articles. However, the information is not well-structured and sometimes mixed up.

The manuscript entitled "Link of mitophagy between oxidative stress conditions and central nervous system diseases" reviews how mitophagy is playing essential role in homeostasis, how dysregulation causes neurodegeneration and how combating oxidative species and targeting mitophagy can contribute to treat neurodegenerative diseases.

Although it is a noteworthy idea, there are many unconnected phrases picked up from single articles that makes the manuscript very difficult to read. Besides, figure 1 is not enough to sum up all the information described. Moreover, figure 1 shows some mistakes such as in the PD line, "loss of dopaminergic neurons in SN" should be at the end, and so on.

There are some typo and grammatical mistakes that probably should require a professional revision by a native English speaker.
